# Supplementary material
Source: publisher site journal article supplement (https://www.spandidos-publications.com/5613/downloadSupplementary)

Figure S1. Quality Assessment of Diagnostic Accuracy Studies-2 assessment of studies selected for meta-analysis. Risk of bias and applicability concerns (A) summary graph and (B) overall summary.

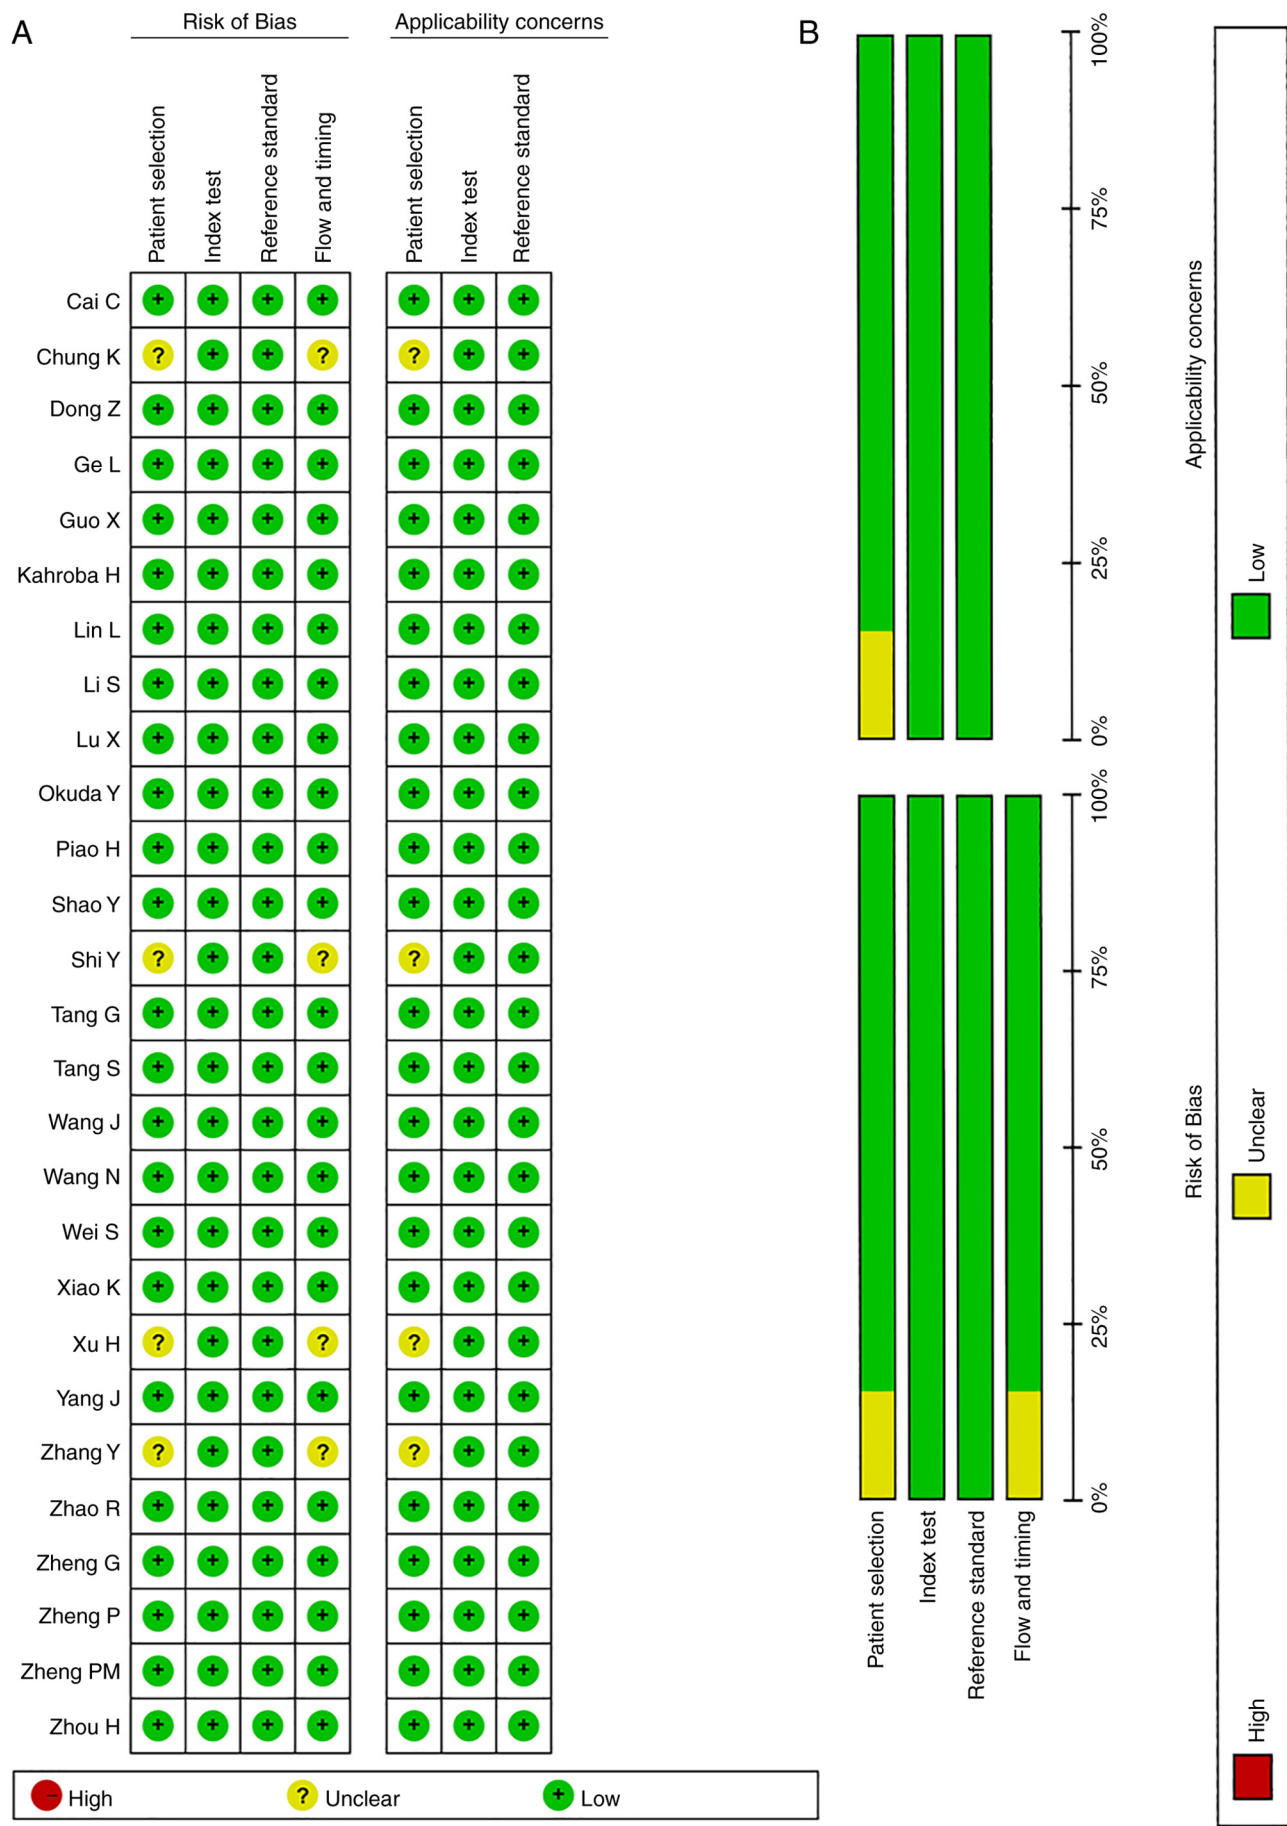

Figure S2. Funnel plot analysis of the publication bias of studies selected for meta-analysis with 95% confidence limits.

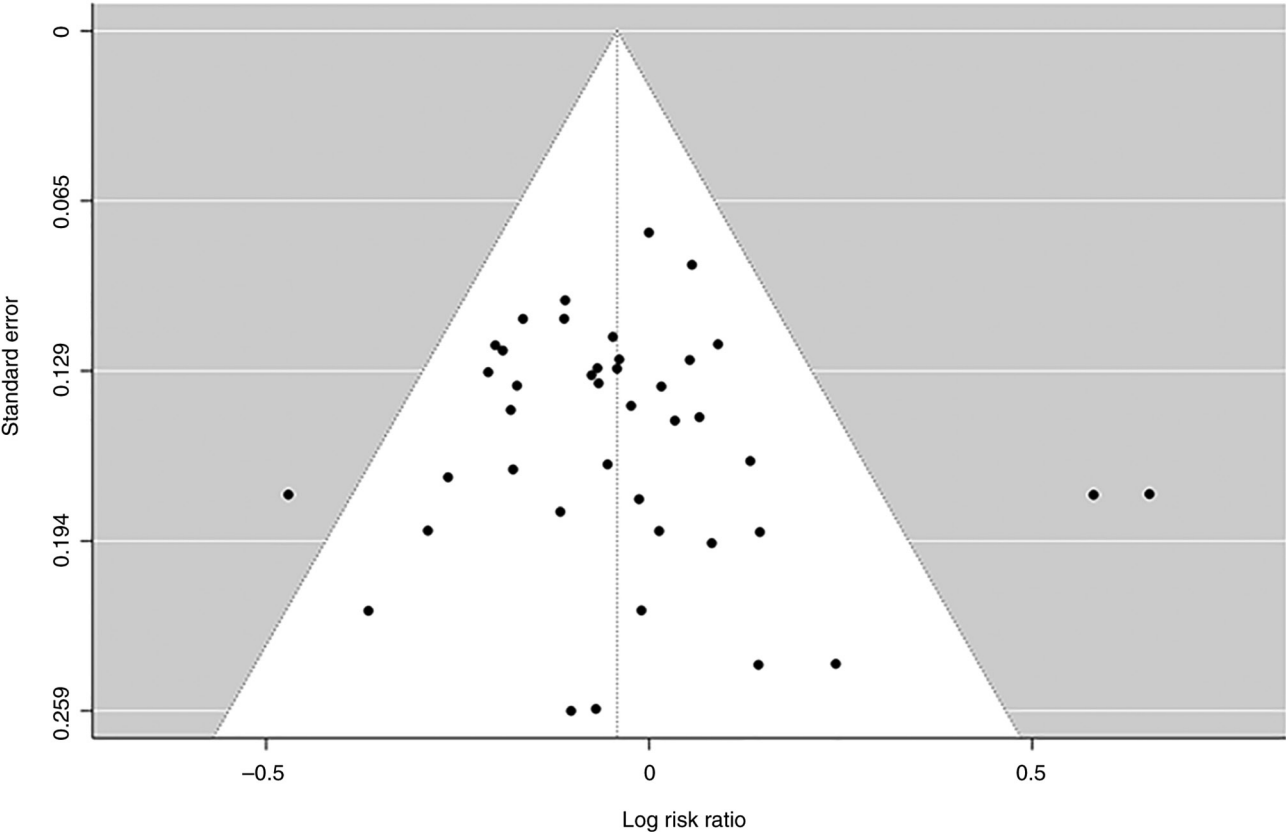

Supplement: Supplementary file 1 [file downloadSupplementary]
